# Supplementary material for: Fast formation of superhydrophobic octadecylphosphonic acid (ODPA) coating for self-cleaning and oil/water separation
Source: Royal Society of Chemistry journal article supplement (doi:10.1039/c4sm01616e), 2014-01-01
Supplement: c4sm01616e1.pdf [file c4sm01616e1.pdf]

## Electronic Supplementary Information

### **Fast Formation of Superhydrophobic Octadecylphosphonic Acid (ODPA) Coating for Self-cleaning and Oil/Water Separation †**

Chunai Dai,<sup>ab</sup> Na Liu,<sup>a</sup> Yingze Cao,<sup>a</sup> Yuning Chen,<sup>a</sup> Fei Lu<sup>a</sup> and Lin Feng<sup>\*a</sup>

<sup>a</sup>*Department of Chemistry, Tsinghua University, Beijing 100084, P. R. China. E-mail: fl@mail.tsinghua.edu.cn*

<sup>b</sup>*School of Science, Beijing Jiaotong University, Beijing 100044, P. R. China. E-mail: chadai@bjtu.edu.cn*

This Supplementary Information section contains:

Video 1. “Water-removing” type oil/water separation: Straightforward oxidation of a copper substrate produces an underwater superoleophobic mesh. Water can selectively penetrate through the mesh whereas oil (petroleum ether) is blocked.

Video 2. “Oil-removing” type oil/water separation: Due to the fast formation of a phosphonate coating on the alkaline-oxidized mesh, the as-prepared mesh can be used for oil/water separation while oil (petroleum ether) can selectively penetrate through the mesh whereas water is blocked.
